# Latitudinal metacommunity gradients in New Zealand stream invertebrates

*Jonathan D. Tonkin*<sup>1\*</sup>

*Russell G. Death*<sup>2</sup>

*Timo Muotka*<sup>3,4</sup>

*Anna Astorga*<sup>5</sup>

*David A. Lytle*<sup>1</sup>

<sup>1</sup>*Department of Integrative Biology, Oregon State University, Corvallis, Oregon 97331, USA*

<sup>2</sup>*Institute of Agriculture and Environment, Massey University, Palmerston North, New Zealand*

<sup>3</sup>*Department of Ecology, University of Oulu, P.O. Box 3000, FI-90014, Finland*

<sup>4</sup>*Finnish Environment Institute, Natural Environment Centre, P.O. Box 140, FI-00251 Helsinki, Finland*

<sup>5</sup>*Institute of Ecology and Biodiversity, P. Universidad Catolica de Chile & Centro de Investigación de Ecosistemas de la Patagonia, Coyhaique, Chile*

*\*Corresponding author: E: [jdtonkin@gmail.com](mailto:jdtonkin@gmail.com), Ph: +1 541-908-7899.*

## Abstract

That biodiversity declines with latitude is well known, but whether a metacommunity process is behind this gradient has received limited attention. We tested the hypothesis of a shift from dispersal limitation to mass effects with increasing latitude, along with a series of related hypotheses. We explored these hypotheses by examining metacommunity structuring in stream invertebrate metacommunities spanning the length of New Zealand (~1300 km), further disentangling the role of dispersal by deconstructing assemblages into strong and weak dispersers. Given the highly dynamic nature of New Zealand streams, our alternative hypothesis was that these systems are so unpredictable (at different stages of post-flood succession) that metacommunity structuring is highly context dependent from region to region. We rejected all of our primary hypotheses, pinning this lack of fit on the strong unpredictability of New Zealand's dynamic stream ecosystems and unique fauna that has evolved to cope with these conditions. While local community structure turned over predictably along this latitudinal gradient, metacommunity structure was highly context dependent and dispersal traits did not elucidate patterns. Moreover, the emergent metacommunity types exhibited no trends, nor did the important environmental variables. These results provide a cautionary tale for examining singular metacommunities. The considerable level of unexplained context dependency suggests that any inferences drawn from one-off snapshot sampling may be misleading and further points to the need for more studies on temporal dynamics of metacommunity processes.

Keywords: Metacommunity structure; metacommunity types; latitudinal gradient; environmental stochasticity; stream community

## 37 Introduction

38 Latitude is a key factor regulating biodiversity globally (Hillebrand 2004, Jocque et al. 2010),  
39 but other factors such as seasonality and predictability of local environments can strongly  
40 influence this relationship. As a key mechanism behind the latitudinal diversity gradient,  
41 climate increases in harshness with increasing latitude (Stevens 1989). However, many  
42 other factors influence local climate including island size and the level of isolation. Isolated  
43 oceanic islands, for instance, have lower seasonality and predictability than similarly placed  
44 continental locations (Tonkin et al. Under review; Fig. 1). Jocque et al. (2010) argue that  
45 shifts in climatic stability with latitude drives a dispersal–ecological specialisation trade-off  
46 at the metacommunity level, producing gradients in dispersal ability, ecological specialisation,  
47 range size, speciation and species richness.

48 Community differences attributable to latitude are therefore likely to be driven by  
49 underlying metacommunity processes. Four metacommunity paradigms have been synthesised  
50 to summarise the relative roles of local (niche) and regional (dispersal) processes in community  
51 assembly (Leibold et al. 2004, Holyoak et al. 2005): neutral, patch dynamics, species sorting,  
52 mass effects (in order of increasing importance of dispersal). The importance of dispersal, in  
53 particular, will depend on many factors including the spatial extent of a metacommunity and  
54 amount of environmental heterogeneity present between sites (Mykrä et al. 2007, Heino et al.  
55 2015a). Spatial extent can regulate the role of species sorting (i.e. environmental filtering),  
56 ranging from mass effects (i.e. dispersal overriding local niche sorting) in highly connected  
57 systems to dispersal limitation at large spatial extents (Heino et al. 2015b). What remains to  
58 be tested, however, is the influence that latitude has on the roles of different metacommunity  
59 processes (Jocque et al. 2010). In a testable hypothesis, Jocque et al. (2010) predicted a  
60 stronger role of dispersal limitation in the tropics with a shift to more species sorting and  
61 mass effects with increasing latitude.

62 Situated at mid-latitudes, New Zealand comprises a series of oceanic islands spanning a  
63 large latitudinal gradient. With a climate reflecting its oceanic position, rainfall (Fig. 1) and  
64 river flow regimes are typically unpredictable (Winterbourn et al. 1981). Coupled with their

65 flashy flow regimes comes a lack of seasonality in some food resources because the vegetation  
66 is dominated by an evergreen flora (Winterbourn et al. 1981, Thompson and Townsend 2000).  
67 These factors ultimately lead to a unique, largely generalist and seasonally asynchronous  
68 stream fauna adapted to coping with these harsh conditions and climatic unpredictability  
69 (Winterbourn et al. 1981, Thompson and Townsend 2000). Consequently, New Zealand  
70 stream communities provide an interesting test case for investigating latitudinal controls on  
71 community structure.

72 To test a series of hypotheses related to metacommunity structuring across a broad  
73 latitudinal gradient, we explored gradients of stream invertebrate metacommunity structure  
74 (spatial structuring and environmental filtering) spanning the length of New Zealand (~1300  
75 km). As a secondary exploration, we examined the best-fit idealised ‘metacommunity types’  
76 assigned through the Elements of Metacommunity Structure framework (EMS; Leibold and  
77 Mikkelsen 2002). To further disentangle the role of dispersal, we deconstructed assemblages  
78 into strong and weak dispersers. Doing so can be fruitful for exploring processes behind  
79 latitudinal diversity gradients (Kneitel 2016). Taking this multi-faceted approach across  
80 this latitudinal gradient allows for identifying complementary patterns in factors shaping  
81 metacommunities, compared to local community structure, advancing our understanding of  
82 how communities assemble in such dynamic landscapes.

83 We tested the following primary hypothesis based on the predictions of Jocque et al.  
84 (2010): Species sorting and mass effects are the main metacommunity dynamics structuring  
85 these assemblages ( $H_{1a}$ ) and the role of mass effects will increase progressively from north to  
86 south ( $H_{1b}$ ). However, the gradient length of environmental conditions and the spatial extent  
87 of metacommunities will interact with latitude to govern metacommunity structuring. The  
88 alternative to this hypothesis ( $H_{1A}$ ) is that, given the highly dynamic nature of New Zealand  
89 streams (Winterbourn et al. 1981), these systems are so unpredictable (at different stages  
90 of post-flood succession) that metacommunity structuring is highly context dependent from  
91 region to region.

92 We also tested the following secondary hypotheses: ( $H_2$ ) In metacommunities with the  
93 largest spatial extents, dispersal limitation will be evident, weakening the contribution of

94 environmental variables and increasing spatial structuring on local assemblages, particularly  
95 for weak dispersers (Heino et al. 2015b). Alternatively, ( $H_2A$ ) in metacommunities with the  
96 smallest spatial extents, mass effects will also increase the amount of variation explained by  
97 space through spatial autocorrelation, particularly for strong dispersers (Heino et al. 2015b).  
98 If spatial extent and dispersal limitation are interacting, deconstructing the full assemblage  
99 into dispersal groups, should elucidate the patterns.  $H_3$ : Based on the predictions of Jocque  
100 et al. (2010), strong dispersers will increase from north to south. As it was a secondary  
101 exploratory analysis, we did not form any specific hypotheses about the gradients of EMS.

## 102 **Methods**

### 103 **Study sites**

104 We used data previously collected (Astorga et al. 2014) from 120 streams in eight regions (15  
105 sites in each region), spanning a latitudinal gradient of 12 degrees (Fig. 2). Site selection  
106 followed a series of criteria to minimize differences between regions. Streams were sampled  
107 primarily in protected areas (National or State Forest Parks) and were restricted to those  
108 with maximum of 14% exotic forestry and 30% pasture in the upstream catchment. All  
109 sites had a minimum intact riparian buffer of 50 m (Freshwater Ecosystems of New Zealand;  
110 FENZ) (Leathwick et al. 2010) and were selected in proportion to FENZ classes in regions.  
111 Sites were restricted to  $< 7$  m wide headwater streams (order 1-3), with similar aspect and  
112 with a rocky substrate, and sampling was confined to the riffle zone. All sites had permanent  
113 flow and the large majority of streams were runoff fed.

### 114 **Benthic macroinvertebrate sampling**

115 Sampling was performed between February and April 2006 (Austral summer/autumn) and  
116 benthic macroinvertebrates were sampled using two-minute kick-net (0.3-mm mesh) samples.  
117 These were performed with the goal of covering most of the microhabitats present in a ca.  
118  $100 \text{ m}^2$  riffle section. This approach captures ca. 75% of the benthic invertebrate species  
119 at a site, covering  $1.3 \text{ m}^2$  of the benthos (Mykra et al. 2006). Samples were stored in 70%

120 ethanol and later sorted and identified to the lowest possible taxonomic level (usually genus  
121 or species, but certain difficult-to-identify species, such as chironomid midges were left at  
122 higher taxonomic levels), following Winterbourn et al. (2000).

123 To help understand the role of dispersal (inherent in all of our hypotheses), we focused  
124 our analysis on three data matrices: All species combined, species with high dispersal ability,  
125 and species with low dispersal ability. These dispersal ability groups were assigned based on  
126 pre-defined trait categories established for New Zealand aquatic invertebrates (Doledec et al.  
127 2006, 2011).

## 128 **Environmental variables**

129 While a plethora of variables can influence the structure of stream communities, we included  
130 several previously-identified important local habitat variables, as well as stream order and  
131 elevation in our analyses (Table 1). Local habitat variables were as follows: water temperature,  
132 electrical conductivity, pH, wetted width, reach slope, water depth, overhead canopy cover,  
133 periphyton biomass (chlorophyll *a*), bryophyte percent cover, Pfankuch index (bottom  
134 component), and substrate size index (SI).

135 Depth was measured at 40 random locations in transects across the channel. Canopy  
136 cover was measured at 20 evenly-spaced cross-channel transects with a densiometer. Channel  
137 slope was measured with an Abney level over 10–20 m. Percentage of bryophytes was visually  
138 estimated for each reach. Substrate composition was measured by taking 100 randomly-  
139 selected particles at 1-m intervals along a path 45° to the stream bank in a zig-zag manner.  
140 Particles were assigned to each of 13 size classes: bedrock, >300, 300–128, 128–90.5, 90.5–64,  
141 64–45.3, 45.3–32, 32–22.6, 22.6–16, 16–11.3, 11.3–8 8–5, and <5 mm. These were then  
142 converted to a single substrate size index (SI) by summing the mid-point values of each size  
143 class weighted by the number of stones in each class (bedrock was assigned a nominal size of  
144 400 mm).

145 Stream bed stability was assessed with the bottom component of the Pfankuch Stability  
146 Index (Pfankuch 1975). The Pfankuch Index is a visual assessment method designed to give

147 an index of channel stability. The index can be broken down into three individual components:  
148 upper banks, lower banks and stream bed (bottom). We used the bottom component as it is  
149 the most relevant to stream invertebrates (Schwendel et al. 2012). The bottom component  
150 consists of six wetted channel attributes (substrate brightness, angularity, consolidation,  
151 percentage of stable materials, scouring, and amount of clinging aquatic vegetation), which  
152 can be assigned to predetermined categories with weighted scores. The sum of these scores  
153 represents the stability of the substrate, where high values represent low stability.

154 As an assessment of periphyton biomass (measured as chlorophyll *a*:  $\mu\text{g cm}^2$ ) at each  
155 site, five stones were randomly selected from the sample riffle and frozen for later analysis.  
156 Pigments were extracted in the laboratory by soaking the stones in 90% acetone for 24 h at 5°C  
157 in the dark. Absorbances were read using a Cary 50TM Conc UV-Visible spectrophotometer,  
158 and chlorophyll *a* was calculated using the method of Steinman and Lamberti (1996). Stone  
159 surface area was corrected using the method of Graham et al. (1988), assuming only the top  
160 half of the stone was available for periphyton growth.

## 161 **Statistical analyses**

162 All analyses were performed in *R* version 3.1.1 (R Core Team 2014).

### 163 **Summarising patterns across regions**

164 To visualise patterns in the environmental conditions of sites, we used Principal Components  
165 Analysis (PCA), performed with the *princomp* function, on the full suite of normalised  
166 environmental variables. Similarly, to examine patterns in macroinvertebrate communities  
167 across all 120 sites, we performed ordination with non-metric multidimensional scaling  
168 (nMDS), on  $\log(x) + 1$  abundance data. We ran this using the *metaMDS* function, based  
169 on Bray-Curtis distances, in the *vegan* package (Oksanen et al. 2013). To test whether  
170 communities differed across the eight regions, we used PERMANOVA, based on the *adonis*  
171 function and 999 permutations in *vegan*. To compare the properties of diversity in each of  
172 our eight regions, and gain insight into the completeness of sampling for each region, we  
173 calculated species accumulation curves (SAC). We did this using the *specaccum* function in

174 *vegan*, based on the *exact* method developed by Ugland et al. (2003).

175 Given the importance of spatial extent and environmental heterogeneity on metacom-  
176 munity structuring, we calculated these for each metacommunity. For the spatial extent,  
177 we calculated the convex hull of points making up each metacommunity using the *chull*  
178 function, followed by calculating the area of the polygon using the *Polygon* function. For  
179 environmental heterogeneity, we calculated the homogeneity of group dispersions using the  
180 *betadisper* function in *vegan*, following the methods of Anderson (2006).

### 181 **Metacommunity structuring and role of dispersal ( $H_{1-3}$ )**

182  $H_1$  and  $H_2$  were tested using a variance partitioning approach (Borcard et al. 1992, Peres-  
183 Neto et al. 2006), where we disentangled the relative influence of spatial and environmental  
184 variables on metacommunity structure of the eight metacommunities ( $n = 15$ ) using Hellinger-  
185 transformed macroinvertebrate community data. This method uses partial redundancy  
186 analysis (pRDA), a constrained ordination technique, to partition the variation into the  
187 pure components of space, environment and their shared contribution to the explanation of  
188 community structure. This allows isolation of the pure effects of environmental gradients  
189 from spatial structure (i.e. environmental filtering) and the pure effects of spatial structure  
190 from environmental gradients (i.e. dispersal effects). Shared remaining variation may result  
191 from interactive effects such as spatially structured environmental gradients or dispersal that  
192 is dependent on topography, for instance. The environmental component in our analysis  
193 represents the set of pre-selected local habitat variables, and we represented the spatial  
194 structuring through Principal Coordinates of Neighbour Matrices (PCNM).

195 We created a set of spatial eigenvectors to represent the distribution of sites in space using  
196 PCNM (Borcard and Legendre 2002, Dray et al. 2006) with the *pcnm* function in the *vegan*  
197 package. This method transforms spatial distances between all sites in a metacommunity  
198 based on a distance matrix into rectangular data for use in constrained ordination methods.  
199 To do this, we used geographic coordinates to create a distance matrix using Euclidean  
200 distances. PCNM vectors represent a gradient of organisation of sites at different spatial  
201 scales, ranging from large-scale to small. That is, PCNM1 represents the broadest-scale

202 arrangement of sites, through to the last vector representing much finer arrangement. Only  
203 eigenvectors with positive eigenvalues were used in the analysis.

204 Prior to variance partitioning, we first ran global RDA models individually for environment  
205 (normalised local habitat, stream order and elevation) and space (PCNM vectors), and tested  
206 for significance. We checked for collinearity in the models and excluded variables with a  
207 variance inflation factor (VIF) of greater than 10. We removed the variable with the highest  
208 VIF first and followed each model sequentially until no variables had a  $VIF > 10$ . After this,  
209 if the global model was significant, we then performed forward selection to select the most  
210 important variables.

211 For forward selection, we used the *ordiR2step* function in the *vegan* package (Oksanen  
212 et al. 2013), which employs the approach outlined by (Blanchet et al. 2008). This method  
213 selects variables that maximise the adjusted  $R^2$  (adj.  $R^2$ ) at each step, and stops when the  
214 adj.  $R^2$  begins to decline, exceeds the scope (i.e. full model adj.  $R^2$ ), or the  $P$  value, which  
215 we set to be 0.05, is exceeded. If the global model was non-significant, we regarded that  
216 dataset to have an  $R^2$  of 0.

217 Only if both spatial and environmental models were significant, was variance partitioning  
218 performed between the two groups. We partitioned the variation between forward-selected  
219 environmental variables and forward-selected spatial vectors using pRDA with the *varpart*  
220 function in *vegan*, and tested significance of the pure effects of environment and space using  
221 the *RDA* function.

222 Identifying mass effects (high dispersal overrides species sorting) and dispersal limitation  
223 is central to testing our hypotheses ( $H_1$  and  $H_2$ ). These can both be identified by strong  
224 spatial control (i.e. spatial variables explain community structure) on metacommunities  
225 (Heino et al. 2015b) in the variance partitioning results. However mass effects will be more  
226 likely in spatially confined regions and dispersal limitation at large spatial extents. In contrast,  
227 species sorting is present where environmental control is strongest.

228 To test  $H_3$ , whether strong dispersers increase from north to south, we calculated the  
229 ratio of strong to weak dispersers in each metacommunity in full.



## 230 **Elements of Metacommunity Structure (EMS)**

231 In addition to our core hypothesis testing, we employed the EMS framework (Leibold and  
232 Mikkelsen 2002) as an exploratory examination of metacommunity types along the latitudinal  
233 gradient. EMS is an approach used to explore and characterise emergent properties in a  
234 site-by-species matrix, using three metrics: (1) coherence, or the degree to which different  
235 species respond to the same environmental gradient; (2) turnover (range turnover), or the  
236 degree to which species replace each other along the environmental gradient; and (3) boundary  
237 clumping, or the amount of (dis)similarity (i.e. clumping) in species range boundaries. EMS  
238 differs from the variance partitioning approach in that it concurrently examines multiple  
239 idealised types of metacommunities, by comparing observed patterns against null expectation.

240 Prior to extracting these elements, the site-by-species matrix is organised in the most  
241 coherent manner using reciprocal averaging (Gauch et al. 1977). This method arranges sites  
242 so that the species with the most similar distributions and sites with similar composition  
243 are closest in the matrix (Gauch et al. 1977). This, in essence, arranges sites along a  
244 latent environmental gradient which is likely important in structuring species distributions.  
245 This ordered site-by-species matrix is then compared with random distributions through  
246 permutation of a null matrix.

247 EMS takes a three-step approach in that only if a matrix has significantly positive  
248 coherence, can turnover and clumping be examined. Coherence, the first step, can be  
249 differentiated into non-significant (i.e. random: species assemble independent of each other),  
250 significantly negative (i.e. checkerboard), or significantly positive (i.e. coherent). Checkerboard  
251 patterns represent distributions where species are found in avoidance of each other more often  
252 than chance. This was originally thought to reflect competitive exclusion (Diamond 1975),  
253 but can also represent a host of other causes such as environmental heterogeneity (Gotelli  
254 and McCabe 2002, Boschilia et al. 2008).

255 At each of the steps, the observed ordinated site-by-species matrix is compared with a  
256 null distribution. The matrix is reshuffled based on a predefined algorithm and constraints  
257 and permuted a set number of times. The observed value is then compared with the null.

258 Coherence is calculated through the number of embedded absences in the ordinated  
259 matrix. Embedded absences are gaps in the species range (Leibold and Mikkelson 2002). If  
260 there are more embedded absences than expected by chance (i.e. through the null matrix), a  
261 metacommunity is considered checkerboarded, and vice versa (i.e. fewer embedded absences  
262 than chance). If there is no difference in the observed matrix from chance (null), random  
263 assembly is expected. For comparability, both coherence and turnover are tested using  
264 the standardised z-test. Coherent distributions suggest communities are structured along  
265 an environmental gradient, either individualistically or in groups. Turnover and boundary  
266 clumping are then examined on the positively coherent distributions.

267 The turnover step enables differentiation into the set of gradient models that best fit the  
268 data structure. This is measured as the number of times a species replaces another between  
269 two sites in the ordinated matrix. Significantly negative turnover points to nestedness in  
270 distributions (further described below), whereas significantly positive can be differentiated into  
271 Clementsian, Gleasonian or evenly-spaced gradients. These latter three can be distinguished  
272 based on the level of boundary clumping in species distributions, using Morista's Index  
273 (Morista 1971) and an associated  $\chi^2$  test comparing observed and null distributions. Values  
274 significantly greater than 1 point to clumped range boundaries (i.e. Clementsian gradients),  
275 less than one point to hyperdispersed range boundaries (i.e. evenly-spaced gradients), and no  
276 difference from one points to random range boundaries (i.e. Gleasonian gradients). Nested  
277 subsets are also broken down based on their boundary clumping into clumped, hyperdispersed  
278 and random range boundaries.

279 Rather than adopt the approach of Presley et al. (2010), where non-significant turnover  
280 is further examined into quasi-turnover and quasi-nestedness, we treated non-significant  
281 turnover as a non-structure given that it indicates no difference from the null expectation.  
282 This results in eight possible metacommunity types. Detailed explanation and diagrammatic  
283 representations of these structures are available in several sources (e.g. Leibold and Mikkelson  
284 2002, Presley et al. 2010, Tonkin et al. 2016a).

285 We constrained our null models using the fixed-proportional "R1" method (Gotelli 2000).  
286 This null model maintains site richness, but fills species ranges based on their marginal

287 probabilities. This is a realistic null model from an ecological perspective, given that richness  
288 of a site varies along ecological gradients (Presley et al. 2009). Consequently, this model  
289 is recommended in the EMS analysis as it is relatively insensitive to type I and II errors  
290 (Presley et al. 2009). Other methods can incorporate too much or too little biology into the  
291 null model and can be thus prone to type I and II errors (Gotelli 2000, Presley et al. 2009).  
292 Using the R1 null model, generated in the *vegan* package (Oksanen et al. 2013), we produced  
293 1000 simulated null matrices for each test. We evaluated EMS on presence-absence data,  
294 using the *R* package *Metacom* (Dallas 2014), across the eight metacommunities individually  
295 and restricted our examination to the primary axis of the RA ordination as this represent  
296 the best arrangement of matrices. Prior to running the analysis, we removed all species that  
297 were present in less than two sites, as rare species can bias the EMS results, particularly  
298 coherence and boundary clumping (Presley et al. 2009).

## 299 **Results**

300 The Fiordland and Northland metacommunities had the greatest spatial extents (Fig. 2E),  
301 but there was little difference in environmental heterogeneity between the regions (Fig.  
302 2F). The gradient in environmental conditions was weak across the eight regions, with a  
303 low percentage of variance explained (37%) by the first two principal components (Fig.  
304 2B). Invertebrate communities differed significantly between the eight regions, with a clear  
305 latitudinal trend in assemblage structure (PERMANOVA:  $F_{7,112} = 7.30$ ,  $R^2 = 0.313$ ,  $P =$   
306  $0.001$ ; Fig. 2C). Regional richness tended to be highest at the North of each island and  
307 decline towards the southern zones (Fig. 2D). The regional pool of most regions were well  
308 sampled. However, Kahurangi did not reach a clear asymptote and had the steepest species  
309 accumulation curve. Moreover, the North Island regions' curves tended to reach a much  
310 clearer asymptote compared to those in the South Island.

### 311 **Metacommunity structuring and the role of dispersal ( $H_{1-3}$ )**

312 There was no gradient with latitude in the relative importance of environmental or spatial  
313 control for all species combined and for individual dispersal groups (Fig. 3) suggesting  $H_1$

314 can be rejected. Similarly, there was no relationship between spatial extent, dispersal ability  
315 and relative role of spatial or environmental components in the variance partitioning models,  
316 thus  $H_2$  can also be rejected. Finally, contrary to  $H_3$ , the ratio of strong to weak dispersers  
317 decreased from north to south (Fig. 4).

318 When considering all species together, only three of the eight regions had significant  
319 environmental and spatial components together, and thus could be considered for variance  
320 partitioning (Fig. 3). In the dispersal group datasets, only one of the eight regions had  
321 combined significant environmental and spatial components. Environmental control was  
322 more commonly important than spatial in structuring these metacommunities. Northland  
323 exhibited no spatial or environmental structure for any of the datasets.

324 Considering all models (including those assigned 0% explained), environmental variables  
325 explained more of the variation when the whole community was considered (mean Adj.  $R^2$   
326 = 0.134; 13.4% variance explained) compared to breaking into high (7.1%) and low (4.8%)  
327 dispersal ability groups. This was particularly evident for certain regions, such as Westland,  
328 which could be explained well when considering the full community (strongest model), but  
329 not for the dispersal groups. However, strong dispersers had on average higher adjusted  $R^2$   
330 values (Adj.  $R^2$  = 0.191; 19.1% explained) when only considering the significant models,  
331 than all combined (18.0%) or weak dispersers (9.6%). Spatial variables explained less of  
332 the variation in community structure than environmental, when non-significant models were  
333 included (Adj.  $R^2$  - All: 0.047; High: 0.049; Low: 0.054) but not when only considering  
334 significant models (Adj.  $R^2$  - All: 0.126; High: 0.200; Low: 0.143).

335 Forward-selected environmental variables were highly variable in the RDA models, with  
336 no particular variable consistently important across the eight metacommunities (Table 2;  
337 Table S1).

### 338 **Metacommunity types (EMS)**

339 There was no latitudinal trend in metacommunity type for all organisms combined and for  
340 each of the dispersal ability groups (Table 3). For the full community dataset, Gleasonian  
341 gradients were the most common pattern (five regions), indicating positive coherence and

342 turnover, but no boundary clumping. The remaining regions' metacommunity types consisted  
343 of two regions with random structures and one with no structure (non-significant turnover).  
344 Clementsian gradients were more common for strong dispersers, with the remaining regions  
345 having either random (two regions), Gleasonian or no structure (non-significant turnover;  
346 Table 3). Weak dispersers were much more variable between the regions, often with weaker  
347 coherence. In fact, four regions exhibited random distributions represented by non-significant  
348 coherence. The remaining regions had either Gleasonian (two regions), Clementsian and no  
349 structure. Egmont (Clementsian) and Westland (random) had the same pattern between high  
350 and low dispersal ability groups. Tararua consistently exhibited weak patterns with either  
351 random or no structure, and Westland metacommunities were always randomly distributed.

## 352 Discussion

353 As a result of the relatively high latitude of New Zealand and based on the hypotheses of  
354 Jocque et al. (2010), we hypothesised ( $H_1$ ) a dominant role of species sorting and mass effects  
355 in structuring these assemblages ( $H_{1a}$ ) and an increasing role of mass effects from north to  
356 south ( $H_{1b}$ ). However, despite a clear latitudinal gradient in assemblages at the community  
357 level, what emerged at the metacommunity level was more idiosyncratic. In particular, there  
358 was no latitudinal trend in either environmental vs. spatial control (rejecting  $H_{1b}$ ) or the  
359 idealised metacommunity types tested through the EMS analysis at both the full community  
360 level and for dispersal groups. This lack of fit to the hypothesis of Jocque et al. (2010) likely  
361 reflects the unique characteristics of New Zealand streams (partially supporting  $H_{1A}$ ).

362 New Zealand comprises a series of mid-latitude oceanic islands, with a typically unpre-  
363 dictable climate (Fig. 1) and flashy river flow regimes (Winterbourn et al. 1981) reflecting  
364 its oceanic position. At a single time-point, communities are therefore most likely at different  
365 stages of post-flood recolonisation ( $H_{1A}$ ). This represents a fundamentally important factor  
366 controlling metacommunity dynamics, as the relative role of local and regional processes  
367 will depend on the amount of time that has passed for dispersal and colonisation to play  
368 out (Brendonck et al. 2014), with preceding flow conditions shaping the metacommunity  
369 structure in streams (Campbell et al. 2015).

370 The lack of seasonality and predictability in New Zealand's climate likely plays a strong  
371 role in the low predictability in metacommunity structuring. The hypothesis of Jocque et  
372 al. (2010) does not take into account differences in island size and isolation, fundamental  
373 aspects controlling biodiversity (MacArthur and Wilson 1967). Yet, island and mainland  
374 locations at similar latitudes do not comprise the same climatic patterns (Tonkin et al. Under  
375 review). Continental locations have much greater predictability in their seasonality compared  
376 to islands. To demonstrate this point, we compared a 30-y sequence of monthly rainfall totals  
377 from central North Island New Zealand with Western Australia, a Mediterranean climate,  
378 using wavelet analysis (Fig. 1) (Torrence and Compo 1998). This figure demonstrates clearly  
379 the strongly seasonal and predictable pattern apparent in Western Australia, with a significant  
380 and repeatable cycle at the 1-y time period over the full sequence. In contrast, New Zealand's  
381 climate exhibits no repeatability in the rainfall, with very few time points in the sequence  
382 indicating any power at the 1-y period.

383 New Zealand streams are also unique for a variety of other reasons, including: rivers  
384 tend to be short, swift and steep due to the narrow landmass and tectonically active nature;  
385 evergreen vegetation dominates the flora; and riparian vegetation is scarce for much of their  
386 length leading to a predominance of autochthonous rather than allochthonous control of  
387 river food webs (Winterbourn et al. 1981, Thompson and Townsend 2000). As such, New  
388 Zealand streams are considered as being physically, rather than biologically, dominated  
389 systems (Winterbourn et al. 1981). These factors, in turn, have led to the evolution of a  
390 unique stream invertebrate fauna with flexible and poorly synchronised life histories, and  
391 generalist feeding behaviour (browsers predominate) (Winterbourn et al. 1981, Scarsbrook  
392 2000, Thompson and Townsend 2000). Under these circumstances, it is not surprising that  
393 metacommunity dynamics can be difficult to predict, as we clearly demonstrate, without a  
394 strong temporal resolution in the data.

395 Results were highly idiosyncratic between different regions, with considerable variability in  
396 the relative roles of environmental and spatial structuring, the forward-selected environmental  
397 variables, and the idealised metacommunity types, with no real match between the two  
398 approaches. Contrary to our hypothesis ( $H_2$ ), this context dependence did not reflect an

399 interaction between spatial extent and dispersal ability. While much of this unpredictability  
400 may be related to the unique characteristics of New Zealand streams, it is pertinent to  
401 recognise that this is a challenge facing many stream metacommunity studies globally, where  
402 patterns differ considerably between different catchments (Heino et al. 2012, 2015a, Tonkin  
403 et al. 2016b). Lawton (1999) pinpointed this problem of contingency in ecology over a  
404 decade ago suggesting that community ecology is rife with contingency, so much so that  
405 generality is unlikely. Lawton goes on to highlight that the problem is indeed most severe at  
406 the intermediate organisational level of communities, compared to more predictable lower  
407 (e.g. populations) or higher levels (e.g. macroecology). Metacommunities are indeed difficult  
408 systems to predict, with processes affecting different subsets of organisms and operating  
409 at specific times (Driscoll and Lindenmayer 2009). One source of context dependence in  
410 metacommunity structuring is differences between different trait modalities, such as dispersal  
411 modes (Thompson and Townsend 2006, Canedo-Arguelles et al. 2015, Tonkin et al. 2016c).  
412 Thus, if spatial extent and dispersal limitation were interacting, deconstructing the full  
413 assemblage into dispersal groups should have elucidated the pattern. Yet, contrary to  
414 expectation, examining strong and weak dispersers separately, did not help in explaining  
415 discrepancies in our predictions.

416 Finally, contrary to the expectation of Jocque et al. (2010) that dispersal ability increases  
417 moving away from the equator ( $H_3$ ), we found a decrease in the ratio of strong to weak  
418 dispersers moving from north to south. Theoretically, temporal variability in environmental  
419 conditions promotes increased dispersal ability of organisms (Jocque et al. 2010); an hypothesis  
420 strongly tied with Rapoport's rule of increasing range size with increasing latitude (Stevens  
421 1989). The result we observed may reflect several causes: 1. Lack of time for dispersal and  
422 colonisation to play out post-disturbance (Brendonck et al. 2014, Campbell et al. 2015). 2.  
423 The requirement of a longer latitudinal gradient for these mechanisms to play out. Over  
424 the length of New Zealand, the continuity of habitat availability in space and time, a key  
425 mechanism behind Jocque et al. (2010), likely differs very little. 3. Climatic idiosyncrasies  
426 not reflecting a north-south gradient and thus not selecting for a gradually increased dispersal  
427 ability at higher latitudes.

## 428 **Conclusions**

429 Jocque et al. (2010) highlighted the fundamental role of dispersal in driving the latitudinal  
430 diversity gradient, suggesting a climate-mediated dispersal–ecological specialisation trade-off  
431 as a key factor regulating this pattern. We tested several hypotheses based on those of Jocque  
432 et al. (2010) relating to how New Zealand stream invertebrate metacommunity structure  
433 changed along a broad latitudinal gradient, and examining the mediating role of dispersal. We  
434 rejected all of our primary hypotheses, pinning this lack of fit on the strong unpredictability  
435 of New Zealand’s dynamic stream ecosystems and unique fauna that has evolved to cope  
436 with these conditions. While local community structure turned over predictably along this  
437 latitudinal gradient, metacommunity structure was highly context dependent and dispersal  
438 traits did not elucidate patterns.

439 These results, along with other recent findings (Heino et al. 2012, 2015a, Tonkin  
440 et al. 2016b), provide a cautionary tale for examining singular metacommunities. The  
441 considerable level of unexplained context dependency suggests that any inferences drawn  
442 from one-off snapshot sampling may be misleading. Given the importance of understanding  
443 metacommunity processes for the successful management of river ecosystems (Heino 2013,  
444 Tonkin et al. 2014, Stoll et al. 2016), this level of unpredictability is a major cause for  
445 concern. While spatial replication of multiple metacommunities may elucidate some of this  
446 uncertainty, studies on temporal dynamics of metacommunity processes are clearly needed.  
447 We therefore urge researchers to consider the temporal dynamic, particularly in relation to  
448 seasonal cycles and their predictability.

## 449 **Acknowledgements**

450 We thank Fiona Death, Manas Chakraborty and Riku Paavola for field and laboratory  
451 assistance.

452 The authors have no conflicts of interest to declare.



## 453 References

- 454 Anderson, M. J. 2006. Distance-based tests for homogeneity of multivariate dispersions. -  
455 *Biometrics* 62: 245–253.
- 456 Astorga, A. et al. 2014. Habitat heterogeneity drives the geographical distribution of beta  
457 diversity: the case of New Zealand stream invertebrates. - *Ecology and Evolution* 4:  
458 2693–702.
- 459 Blanchet, F. et al. 2008. Forward selection of explanatory variables. - *Ecology* 89: 2623–2632.
- 460 Borcard, D. and Legendre, P. 2002. All-scale spatial analysis of ecological data by means of  
461 principal coordinates of neighbour matrices. - *Ecological Modelling* 153: 51–68.
- 462 Borcard, D. et al. 1992. Partialling out the spatial component of ecological variation. -  
463 *Ecology* 73: 1045–1055.
- 464 Boschilia, S. M. et al. 2008. Do aquatic macrophytes co-occur randomly? An analysis of null  
465 models in a tropical floodplain. - *Oecologia* 156: 203–214.
- 466 Brendonck, L. et al. 2014. Hydrological stability drives both local and regional diversity  
467 patterns in rock pool metacommunities. - *Oikos* 124: 741–749.
- 468 Campbell, R. E. et al. 2015. Flow-related disturbance creates a gradient of metacommunity  
469 types within stream networks. - *Landscape Ecology* 30: 667–680.
- 470 Canedo-Arguelles, M. et al. 2015. Dispersal strength determines meta-community structure  
471 in a dendritic riverine network. - *Journal of Biogeography* 42: 778–790.
- 472 Dallas, T. 2014. metacom: an R package for the analysis of metacommunity structure. -  
473 *Ecography* 37: 402–405.
- 474 Diamond, J. 1975. Assembly of species communities. - In: Cody, M. and Diamond, J. (eds),  
475 *Ecology and evolution of communities*. Harvard University Press, ppp. 342–444.
- 476 Doledec, S. et al. 2006. Comparison of structural and functional approaches to determining  
477 landuse effects on grassland stream invertebrate communities. - *Journal of the North*

- 478 American Benthological Society 25: 44–60.
- 479 Doledec, S. et al. 2011. Invertebrate community responses to land use at a broad spatial  
480 scale: Trait and taxonomic measures compared in New Zealand rivers. - *Freshwater*  
481 *Biology* 56: 1670–1688.
- 482 Dray, S. et al. 2006. Spatial modelling: a comprehensive framework for principal coordinate  
483 analysis of neighbour matrices (PCNM). - *Ecological Modelling* 196: 483–493.
- 484 Driscoll, D. and Lindenmayer, D. B. 2009. Empirical tests of metacommunity theory using  
485 an isolation gradient. - *Ecological Monographs* 79: 485–501.
- 486 Gauch, H. G. et al. 1977. A comparative study of reciprocal averaging and other ordination  
487 techniques. - *Journal of Ecology* 65: 157–174.
- 488 Gotelli, N. J. 2000. Null model analysis of species co-occurrence patterns. - *Ecology* 81:  
489 2606–2621.
- 490 Gotelli, N. J. and McCabe, D. J. 2002. Species co-occurrence: a meta-analysis of J. M.  
491 Diamond's assembly rules model. - *Ecology* 83: 2091–2096.
- 492 Graham, A. A. et al. 1988. Measurement of surface area of stones. - *Hydrobiologia* 157:  
493 85–87.
- 494 Heino, J. 2013. The importance of metacommunity ecology for environmental assessment  
495 research in the freshwater realm. - *Biological reviews of the Cambridge Philosophical*  
496 *Society* 88: 166–78.
- 497 Heino, J. et al. 2012. Context dependency and metacommunity structuring in boreal  
498 headwater streams. - *Oikos* 121: 537–544.
- 499 Heino, J. et al. 2015a. A comparative analysis reveals weak relationships between ecological  
500 factors and beta diversity of stream insect metacommunities at two spatial levels. -  
501 *Ecology and Evolution* 5: 1235–1248.
- 502 Heino, J. et al. 2015b. Metacommunity organisation, spatial extent and dispersal in aquatic  
503 systems: patterns, processes and prospects. - *Freshwater Biology* 60: 845–869.
- 504 Hillebrand, H. 2004. On the generality of the latitudinal diversity gradient. - *American*

- 505 Naturalist 163: 192–211.
- 506 Holyoak, M. et al. 2005. Metacommunities - A framework for large-scale community ecology.  
507 - Metacommunities: Spatial Dynamics and Ecological Communities: 1–31.
- 508 Jocque, M. et al. 2010. Climatic control of dispersal-ecological specialization trade-offs: a  
509 metacommunity process at the heart of the latitudinal diversity gradient? - Global  
510 Ecology and Biogeography 19: 244–252.
- 511 Kneitel, J. M. 2016. Climate-driven habitat size determines the latitudinal diversity gradient  
512 in temporary ponds. - Ecology 97: 961–968.
- 513 Lawton, J. H. 1999. Are there general laws in ecology? - Oikos 84: 177–192.
- 514 Leathwick, J. R. et al. 2010. Freshwater ecosystems of New Zealand (fenz) geodatabase.  
515 Users guide.: 57.
- 516 Leibold, M. A. and Mikkelsen, G. M. 2002. Coherence, species turnover, and boundary  
517 clumping: elements of meta-community structure. - Oikos 97: 237–250.
- 518 Leibold, M. A. et al. 2004. The metacommunity concept: a framework for multi-scale  
519 community ecology. - Ecology Letters 7: 601–613.
- 520 MacArthur, R. H. and Wilson, E. O. 1967. The Theory of Island Biogeography. - Princeton  
521 University Press, Princeton.
- 522 Morista, M. 1971. Composition of the I-index. - Researches on Population Ecology 13: 1–27.
- 523 Mykra, H. et al. 2006. The effect of sample duration on the efficiency of kick-sampling in  
524 two streams with contrasting substratum heterogeneity. - Internationale Vereinigung für  
525 Theoretische und Angewandte Limnologie Verhandlungen 29: 1351–1355.
- 526 Mykrä, H. et al. 2007. Scale-related patterns in the spatial and environmental components  
527 of stream macroinvertebrate assemblage variation. - Global Ecology and Biogeography  
528 16: 149–159.
- 529 Oksanen, J. et al. 2013. Vegan: Community Ecology Package. R package version 2.0-10.:  
530 <http://CRAN.R-project.org/package=vegan>.
- 531 Peres-Neto, P. et al. 2006. Variation partitioning of species data matrices: estimation and

- 532 comparison of fractions. - *Ecology* 87: 2614–2625.
- 533 Pfankuch, D. 1975. Stream Reach Inventory and Channel Stability Evaluation.
- 534 Presley, S. J. et al. 2009. Elements of metacommunity structure of Paraguayan bats: multiple  
535 gradients require analysis of multiple ordination axes. - *Oecologia* 160: 781–93.
- 536 Presley, S. J. et al. 2010. A comprehensive framework for the evaluation of metacommunity  
537 structure. - *Oikos* 119: 908–917.
- 538 R Core Team 2014. R: A language and environment for statistical computing.
- 539 Roesch, A. and Schmidbauer, H. 2014. WaveletComp: Computational Wavelet Analysis. R  
540 package version 1.0.
- 541 Scarsbrook, M. R. 2000. Life-histories. - In: Collier, K. J. and Winterbourn, M. J. (eds), New  
542 zealand stream invertebrates: Ecology and implications for management. New Zealand  
543 Limnological Society, Hamilton, ppp. 76–99.
- 544 Schwendel, A. C. et al. 2012. A new approach to assess bed stability relevant for invertebrate  
545 communities in upland streams. - *River Research and Applications* 28: 1726–1739.
- 546 Steinman, A. D. and Lamberti, G. A. 1996. Biomass and pigments of benthic algae. - In:  
547 Hauer, F. R. and Lamberti, G. A. (eds), *Methods in stream ecology*. Academic Press,  
548 ppp. 295–314.
- 549 Stevens, G. C. 1989. The latitudinal gradient in geographical range: How so many species  
550 coexist in the tropics. - *The American Naturalist* 133: 240–256.
- 551 Stoll, S. et al. 2016. Scale-dependent effects of river habitat quality on benthic invertebrate  
552 communities — Implications for stream restoration practice. - *Science of The Total  
553 Environment* 553: 495–503.
- 554 Thompson, R. M. and Townsend, C. R. 2000. New Zealand’s stream invertebrate communities:  
555 an international perspective. - In: Collier, K. J. and Winterbourn, M. J. (eds), New  
556 zealand stream invertebrates: Ecology and implications for management. New Zealand  
557 Limnological Society, Hamilton, ppp. 53–74.
- 558 Thompson, R. M. and Townsend, C. R. 2006. A truce with neutral theory: local deterministic

- 559 factors, species traits and dispersal limitation together determine patterns of diversity in  
560 stream invertebrates. - *Journal of Animal Ecology* 75: 476–484.
- 561 Tonkin, J. D. et al. 2014. Dispersal distance and the pool of taxa, but not barriers, determine  
562 the colonisation of restored river reaches by benthic invertebrates. - *Freshwater Biology*  
563 59: 1843–1855.
- 564 Tonkin, J. D. et al. 2016a. Metacommunity structuring in Himalayan streams over large  
565 elevational gradients: the role of dispersal routes and niche characteristics. - *Journal of*  
566 *Biogeography*: DOI:10.1111/ jbi.12895.
- 567 Tonkin, J. D. et al. 2016b. Context dependency in biodiversity patterns of central German  
568 stream metacommunities. - *Freshwater Biology* 61: 607–620.
- 569 Tonkin, J. D. et al. 2016c. Contrasting metacommunity structure and beta diversity in an  
570 aquatic-floodplain system. - *Oikos* 125: 686–697.
- 571 Torrence, C. and Compo, G. P. 1998. A practical guide to wavelet analysis. - *Bulletin of the*  
572 *American Meteorological Society* 79: 61–78.
- 573 Ugland, K. I. et al. 2003. The species-accumulation curve and estimation of species richness.  
574 - *Journal of Animal Ecology* 72: 888–897.
- 575 Winterbourn, M. J. et al. 1981. Are New Zealand stream ecosystems really different? - *New*  
576 *Zealand Journal of Marine and Freshwater Research* 15: 321–328.
- 577 Winterbourn, M. J. et al. 2000. Guide to the aquatic insects of New Zealand. - *Entomological*  
578 *Society of New Zealand*.

## 579 Tables

580 **Table 1:** Environmental variables used in the analysis.

| Variable        | Units                 | Explanation                               |
|-----------------|-----------------------|-------------------------------------------|
| Temp            | °C                    | Water temperature                         |
| Cond            | $\mu\text{S cm}^{-1}$ | Conductivity                              |
| pH              | -                     | pH                                        |
| Width           | cm                    | Wetted width                              |
| Elev            | m a.s.l.              | Elevation                                 |
| Slope           | $\text{cm m}^{-1}$    | Slope of the stream reach                 |
| Depth           | cm                    | Depth                                     |
| OHCov           | %                     | Percent overhead canopy cover             |
| Chla            | $\mu\text{g cm}^{-2}$ | Chlorophyll <i>a</i> (periphyton biomass) |
| Bryophytes      | %                     | Percent moss cover                        |
| Pfankuch_bottom | -                     | Stream bed stability                      |
| SI              | -                     | Substrate size index                      |
| Order           | -                     | Stream order                              |

581 **Table 2:** Forward-selected environmental variables used in the variance partitioning analysis  
582 when a global RDA model was significant. Only if a global model was significant, was forward  
583 selection performed. Forward-selected variables are given in the “Variables” column. Subset  
584 = subset of species (All species, and strong and weak dispersers). Full results of both global  
585 and forward-selected models, including spatial variables can be found in Table S1.

| Subset | Region | F    | P    | Variables                           |
|--------|--------|------|------|-------------------------------------|
| All    | U      | 2.57 | 0.00 | Temp, pH                            |
| All    | E      | 2.96 | 0.00 | OHCov, Elev, SI, Depth              |
| All    | K      | 2.25 | 0.00 | Cond, OHCov                         |
| All    | A      | 2.64 | 0.03 | Temp                                |
| All    | W      | 4.55 | 0.00 | Cond, pH, Slope                     |
| All    | F      | 2.13 | 0.01 | Order                               |
| Strong | E      | 3.83 | 0.00 | OHCov, Elev, SI                     |
| Strong | K      | 2.64 | 0.01 | Cond, Chla                          |
| Strong | A      | 3.20 | 0.04 | Temp                                |
| Weak   | U      | 3.32 | 0.00 | Temp, pH                            |
| Weak   | T      | 2.57 | 0.00 | OHCov, Pfankuch_bottom, Chla, Depth |
| Weak   | K      | 2.20 | 0.02 | Cond                                |
| Weak   | F      | 2.13 | 0.02 | Order                               |

586 **Table 3:** Results of Elements of Metacommunity Structure analysis examining the best-fit idealised metacommunity structure  
 587 for each metacommunity, including for all species combined, and strong and weak disperser groups. Results are given for the first  
 588 axis of reciprocal averaging ordination on the species by site matrices testing for coherence, species range turnover and boundary  
 589 clumping in each metacommunity of 15 sites across eight regions of New Zealand.

| Subset | Region | df | Coherence |       |      |          |          | Turnover |        |        |          |          | Boundary Clumping |          | Structure   |
|--------|--------|----|-----------|-------|------|----------|----------|----------|--------|--------|----------|----------|-------------------|----------|-------------|
|        |        |    | Abs       | Mean  | SD   | <i>z</i> | <i>P</i> | Re       | Mean   | SD     | <i>z</i> | <i>P</i> | <i>MI</i>         | <i>P</i> |             |
| All    | N      | 58 | 305       | 321.1 | 15.0 | 1.07     | 0.2835   | 2148     | 1649.8 | 580.7  | -0.86    | 0.3909   | 1.17              | 0.3468   | Random      |
| All    | U      | 68 | 277       | 386.6 | 17.7 | 6.18     | < 0.0001 | 9768     | 2659.4 | 823.4  | -8.63    | < 0.0001 | 0.85              | 0.3928   | Gleasonian  |
| All    | E      | 62 | 248       | 367.8 | 19.1 | 6.26     | < 0.0001 | 10931    | 2978.5 | 980.3  | -8.11    | < 0.0001 | 0.68              | 0.2683   | Gleasonian  |
| All    | T      | 42 | 168       | 197.6 | 12.8 | 2.32     | 0.0204   | 1334     | 1095.8 | 388.2  | -0.61    | 0.5394   | 2.12              | 0.0044   | -           |
| All    | K      | 66 | 325       | 384.8 | 19.5 | 3.06     | 0.0022   | 6293     | 3145.3 | 950.0  | -3.31    | 0.0009   | 1.44              | 0.1655   | Gleasonian  |
| All    | A      | 53 | 233       | 340.4 | 19.3 | 5.56     | < 0.0001 | 6387     | 3127.8 | 1032.9 | -3.16    | 0.0016   | 1.66              | 0.0633   | Gleasonian  |
| All    | W      | 63 | 400       | 425.7 | 22.7 | 1.13     | 0.2591   | 6969     | 4705.3 | 1372.5 | -1.65    | 0.0991   | 1.18              | 0.3249   | Random      |
| All    | F      | 56 | 293       | 354.6 | 18.3 | 3.37     | 0.0008   | 5885     | 2942.4 | 977.6  | -3.01    | 0.0026   | 1.05              | 0.4264   | Gleasonian  |
| Strong | N      | 31 | 117       | 149.2 | 9.9  | 3.24     | 0.0012   | 1428     | 595.7  | 228.9  | -3.64    | 0.0003   | 1.74              | 0.0263   | Clementsian |
| Strong | U      | 32 | 127       | 160.4 | 11.2 | 2.99     | 0.0028   | 1892     | 787.7  | 271.7  | -4.06    | < 0.0001 | 2.51              | 0.0003   | Clementsian |
| Strong | E      | 31 | 109       | 168.7 | 12.6 | 4.74     | < 0.0001 | 3552     | 1283.7 | 420.1  | -5.40    | < 0.0001 | 2.20              | 0.0019   | Clementsian |
| Strong | T      | 21 | 66        | 83.4  | 8.1  | 2.14     | 0.0322   | 192      | 411.9  | 159.7  | 1.38     | 0.1685   | 1.62              | 0.0756   | -           |
| Strong | K      | 32 | 132       | 167.1 | 12.6 | 2.79     | 0.0053   | 1712     | 1303.0 | 392.7  | -1.04    | 0.2976   | 1.83              | 0.0121   | -           |
| Strong | A      | 24 | 93        | 134.6 | 10.7 | 3.89     | < 0.0001 | 1974     | 1060.4 | 352.9  | -2.59    | 0.0096   | 0.49              | 0.0894   | Gleasonian  |
| Strong | W      | 30 | 159       | 184.3 | 14.4 | 1.76     | 0.0784   | 2341     | 2052.6 | 592.4  | -0.49    | 0.6263   | 0.52              | 0.0483   | Random      |
| Strong | F      | 22 | 112       | 117.5 | 9.9  | 0.56     | 0.5755   | 1036     | 810.8  | 280.1  | -0.80    | 0.4213   | 2.29              | 0.0008   | Random      |
| Weak   | N      | 24 | 119       | 137.8 | 10.8 | 1.75     | 0.0804   | 1319     | 910.3  | 301.9  | -1.35    | 0.1759   | 0.92              | 0.4207   | Random      |
| Weak   | U      | 33 | 128       | 187.3 | 13.3 | 4.45     | < 0.0001 | 3483     | 1462.2 | 410.0  | -4.93    | < 0.0001 | 0.63              | 0.1168   | Gleasonian  |
| Weak   | E      | 28 | 111       | 156.8 | 11.9 | 3.83     | 0.0001   | 3469     | 1239.6 | 385.7  | -5.78    | < 0.0001 | 1.96              | 0.0038   | Clementsian |
| Weak   | T      | 18 | 87        | 89.5  | 8.1  | 0.31     | 0.7599   | 609      | 513.1  | 167.7  | -0.57    | 0.5673   | 1.72              | 0.0107   | Random      |
| Weak   | K      | 31 | 156       | 175.7 | 12.3 | 1.60     | 0.109    | 2108     | 1282.5 | 382.4  | -2.16    | 0.0309   | 1.14              | 0.3232   | Random      |
| Weak   | A      | 26 | 113       | 158.0 | 13.3 | 3.39     | 0.0007   | 2408     | 1627.6 | 490.9  | -1.59    | 0.1119   | 1.50              | 0.0558   | -           |
| Weak   | W      | 30 | 164       | 190.1 | 13.9 | 1.87     | 0.0611   | 2775     | 1840.7 | 560.3  | -1.67    | 0.0954   | 0.74              | 0.2359   | Random      |
| Weak   | F      | 31 | 147       | 192.4 | 13.3 | 3.42     | 0.0006   | 3861     | 1806.9 | 557.5  | -3.68    | 0.0002   | 1.18              | 0.2630   | Gleasonian  |

590 Notes: Subset = subset of species (All, and strong and weak dispersers), df = degrees of freedom, Abs = number of embedded absences, Re = number of  
 591 replacements, MI = Morista's Index, SD = standard deviation. Mean and SD values are those calculated from the 1000 generated null matrices, based on the "R1"  
 592 null model. Refer to Figure 1 for region names. '-' represents structures with non-significant turnover.



## 593 Figure captions

594 **Figure 1:** Wavelet diagram comparing 30-year monthly rainfall values between central North  
595 Island New Zealand and Mediterranean-climate Western Australia. Wavelet power increases  
596 from blue (low power) to red (high power). Higher power represents greater strength of the  
597 periodicity. The figure illustrates clear annual rainfall cycles in Western Australia (i.e. strong  
598 and consistent power at the 12-month period over the full 30-year cycle) representative of  
599 its Mediterranean climate. This contrasts to the highly unpredictable rainfall cycles in New  
600 Zealand. Wavelet analysis was performed using the R package ‘WaveletComp’ (Roesch and  
601 Schmidbauer 2014).

602 **Figure 2:** Overview of sites and regional invertebrate assemblages across New Zealand. All  
603 plots are colour-coded in the same manner, from North to South. A. Distribution of 120 sites  
604 across eight regions of New Zealand. B. First two components of principal component analysis  
605 on environmental variables used in the study. Proportion of variation explained: PCA1  
606 = 0.21; PCA2 = 0.17. C. Non-metric multidimensional scaling ordination of invertebrate  
607 communities from all 120 sites. 2D stress = 0.21. D. Species accumulation curves for all  
608 species for the eight regions. Regions are ordered from North (left) to South (right). E.  
609 Spatial extent of each metacommunity (normalised area). F. Environmental heterogeneity of  
610 each metacommunity, measured through homogeneity of dispersions.

611 **Figure 3:** Results of variance partitioning of spatial and environmental variables on macroin-  
612 vertebrate communities in eight regions spanning the length of New Zealand. Regions are  
613 ordered from North (left) to South (right). Variance partitioning was performed only where  
614 global RDA models were significant. Certain regions had non-significant global models for  
615 either spatial, environmental or both. Where either spatial or environmental was significant,  
616 we plot the results of the global model (and its significance). Significance of the pure effects of  
617 space or environment are shown with asterisks. All = all species, Strong = strong dispersers,  
618 Weak = weak dispersers.

619 **Figure 4:** Ratio of strong to weak dispersers in each metacommunity. 0 = 1:1 ratio of strong  
620 to weak dispersers. Above the line represents a higher strong to weak disperser ratio.

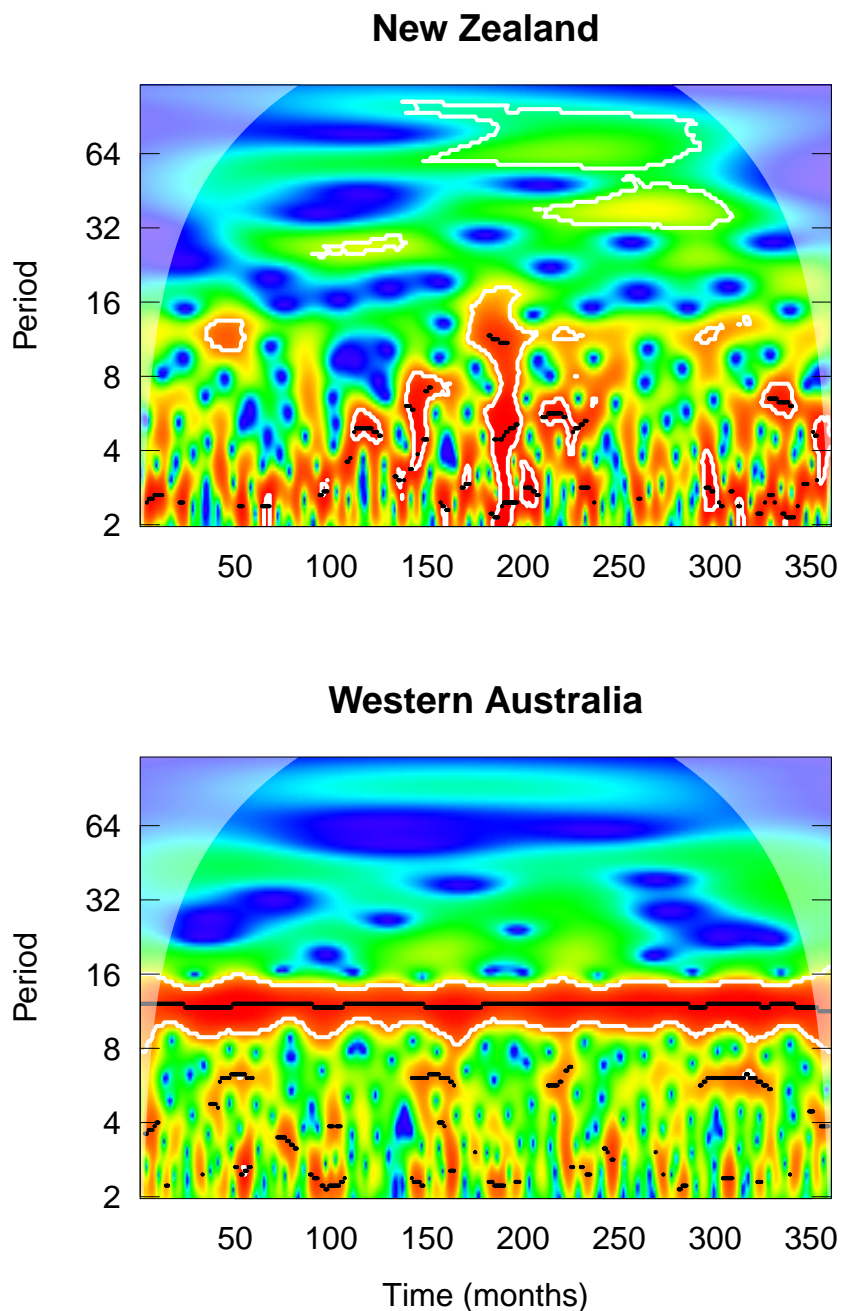

Figure 1: Wavelet diagram comparing 30-year monthly rainfall values between central North Island New Zealand and Mediterranean-climate Western Australia. Wavelet power increases from blue (low power) to red (high power). Higher power represents greater strength of the periodicity. The figure illustrates clear annual rainfall cycles in Western Australia (i.e. strong and consistent power at the 12-month period over the full 30-year cycle) representative of its Mediterranean climate. This contrasts to the highly unpredictable rainfall cycles in New Zealand. Wavelet analysis was performed using the R package 'WaveletComp' (Roesch and Schmidbauer 2014).

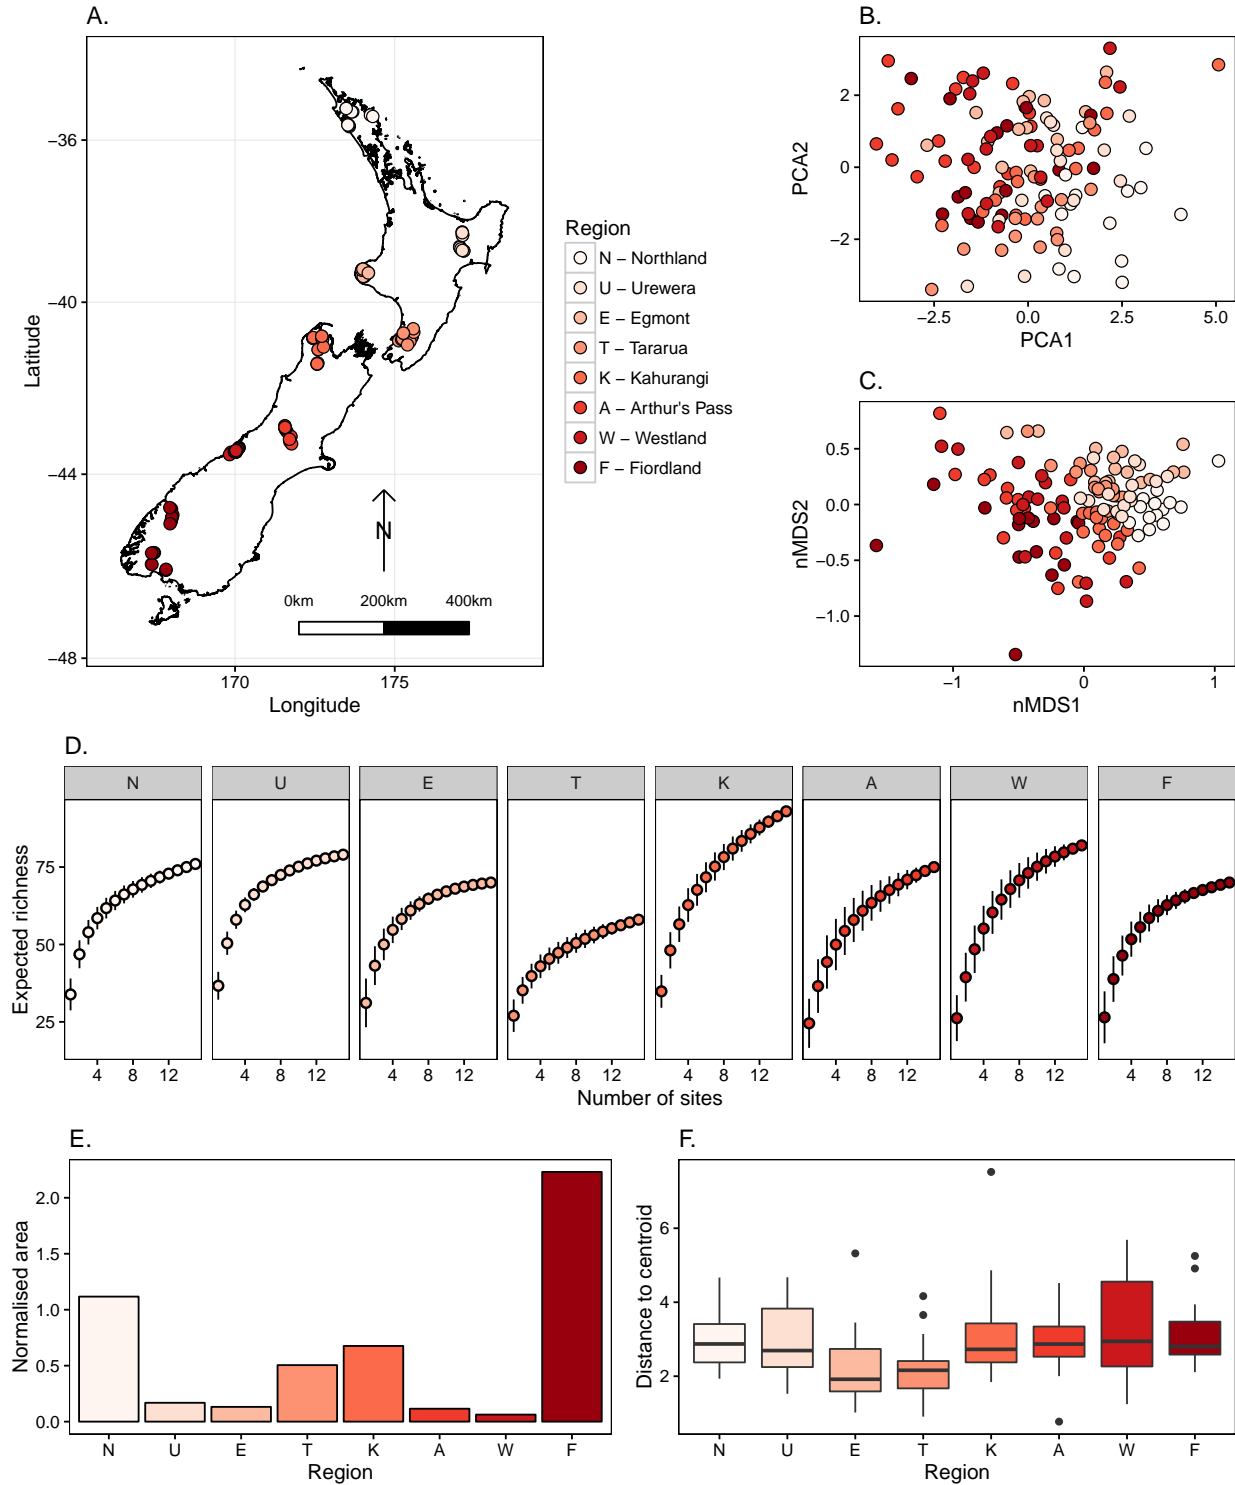

Figure 2: Overview of sites and regional invertebrate assemblages across New Zealand. All plots are colour-coded in the same manner, from North to South. A. Distribution of 120 sites across eight regions of New Zealand. B. First two components of principal component analysis on environmental variables used in the study. Proportion of variation explained: PCA1 = 0.21; PCA2 = 0.17. C. Non-metric multidimensional scaling ordination of invertebrate communities from all 120 sites. 2D stress = 0.21. D. Species accumulation curves for all species for the eight regions. Regions are ordered from North (left) to South (right). E. Spatial extent of each metacommunity (normalised area). F. Environmental heterogeneity of each metacommunity, measured through homogeneity of dispersions.

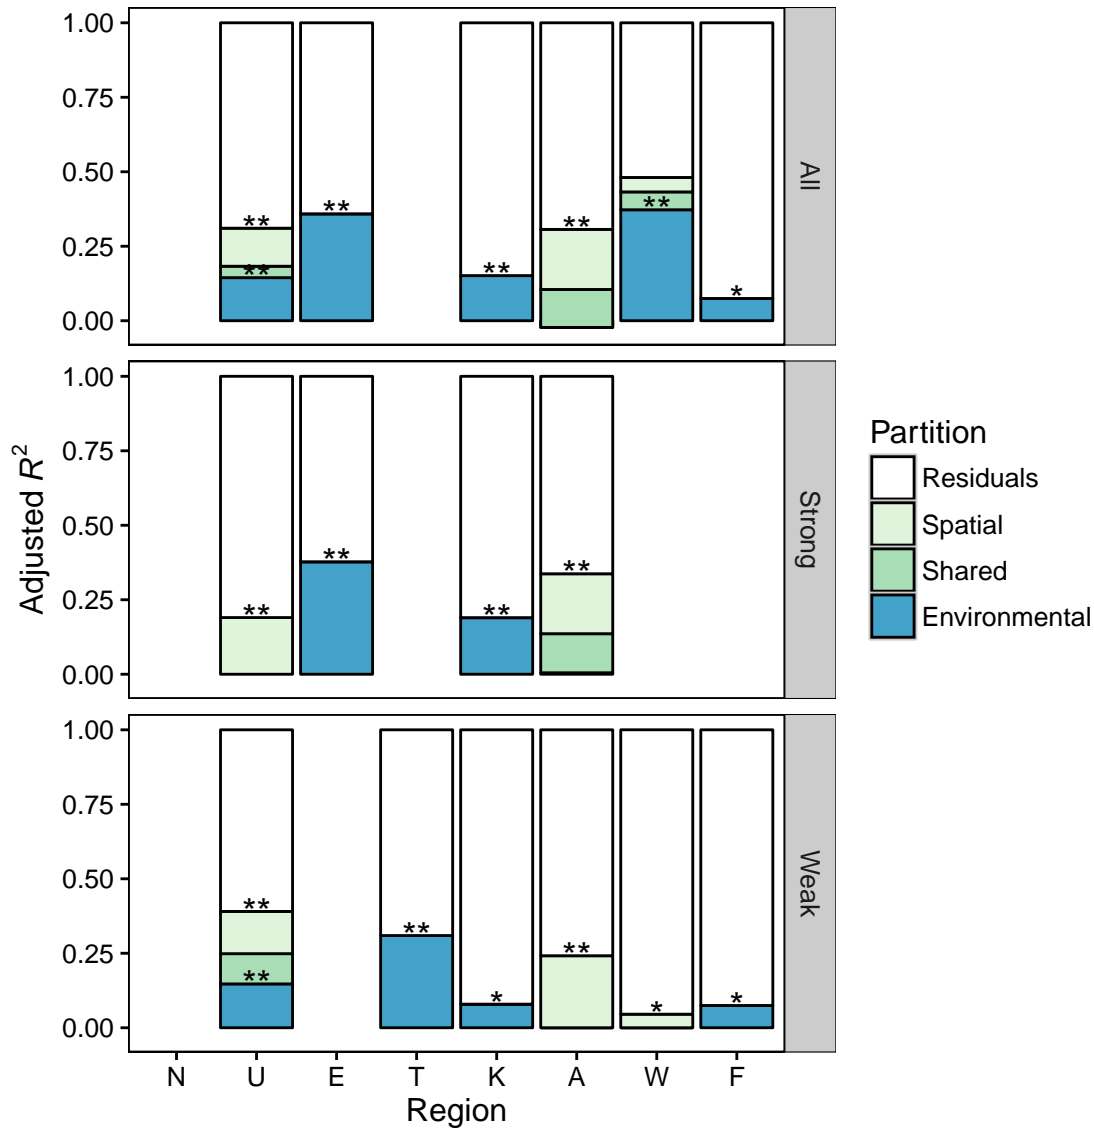

Figure 3: Results of variance partitioning of spatial and environmental variables on macroinvertebrate communities in eight regions spanning the length of New Zealand. Regions are ordered from North (left) to South (right). Variance partitioning was performed only where global RDA models were significant. Certain regions had non-significant global models for either spatial, environmental or both. Where either spatial or environmental was significant, we plot the results of the global model (and its significance). Significance of the pure effects of space or environment are shown with asterisks. All = all species, Strong = strong dispersers, Weak = weak dispersers.

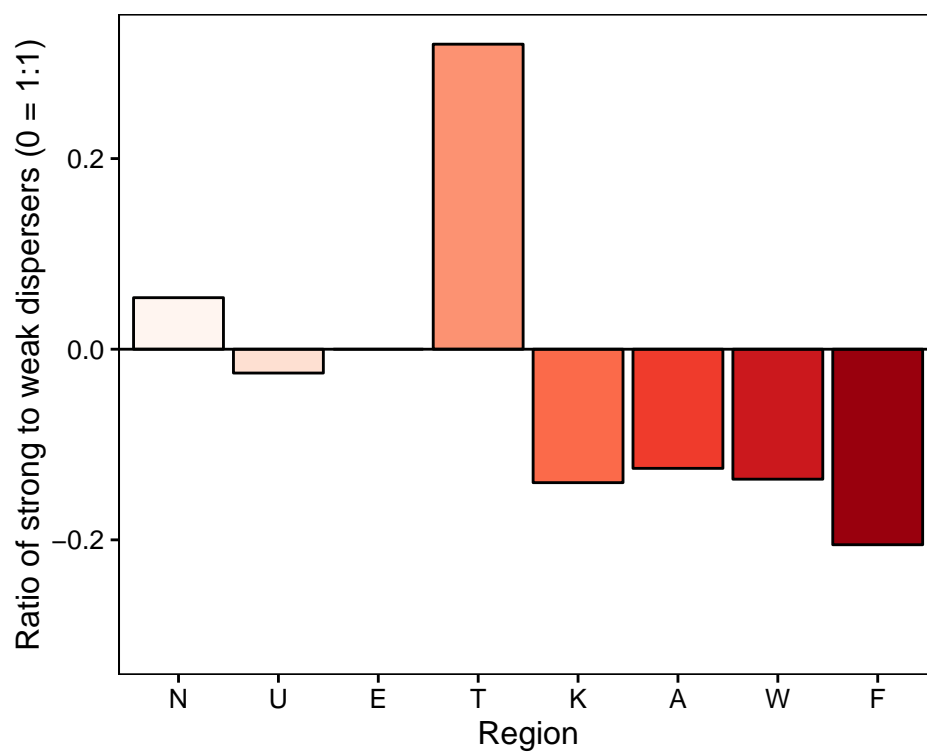

Figure 4: Ratio of strong to weak dispersers in each metacommunity. 0 = 1:1 ratio of strong to weak dispersers. Above the line represents a higher strong to weak disperser ratio.

## 621 Supplementary material

622 **Table S1:** Results of forward selection on both spatial and environmental variables for the  
 623 eight metacommunities. If a global model was significant, forward selection was performed.  
 624 Forward-selected variables are given in the “Variables” column. Subset = subset of species  
 625 (All, and strong and weak dispersers). Global model sig. = Global model significant or not  
 626 (N: no; Y: yes).

| Subset | Region | Data          | F    | P    | Model     | Sig. | Variables              |
|--------|--------|---------------|------|------|-----------|------|------------------------|
| All    | N      | Environmental | 1.02 | 0.50 | Global    | N    |                        |
| All    | N      | Spatial       | 0.90 | 0.69 | Global    | N    |                        |
| All    | U      | Environmental | 1.46 | 0.03 | Global    | Y    |                        |
| All    | U      | Environmental | 2.57 | 0.00 | Fwd. sel. |      | Temp, pH               |
| All    | U      | Spatial       | 1.60 | 0.02 | Global    | Y    |                        |
| All    | U      | Spatial       | 2.39 | 0.00 | Fwd. sel. |      | PCNM1, PCNM3           |
| All    | E      | Environmental | 1.72 | 0.03 | Global    | Y    |                        |
| All    | E      | Environmental | 2.96 | 0.00 | Fwd. sel. |      | OHCov, Elev, SI, Depth |
| All    | E      | Spatial       | 0.84 | 0.73 | Global    | N    |                        |
| All    | T      | Environmental | 1.19 | 0.28 | Global    | N    |                        |
| All    | T      | Spatial       | 0.76 | 0.86 | Global    | N    |                        |
| All    | K      | Environmental | 1.66 | 0.02 | Global    | Y    |                        |
| All    | K      | Environmental | 2.25 | 0.00 | Fwd. sel. |      | Cond, OHCov            |
| All    | K      | Spatial       | 0.81 | 0.85 | Global    | N    |                        |
| All    | A      | Environmental | 1.80 | 0.02 | Global    | Y    |                        |
| All    | A      | Environmental | 2.64 | 0.03 | Fwd. sel. |      | Temp                   |
| All    | A      | Spatial       | 1.97 | 0.00 | Global    | Y    |                        |
| All    | A      | Spatial       | 3.29 | 0.00 | Fwd. sel. |      | PCNM1, PCNM2, PCNM3    |
| All    | W      | Environmental | 2.08 | 0.03 | Global    | Y    |                        |
| All    | W      | Environmental | 4.55 | 0.00 | Fwd. sel. |      | Cond, pH, Slope        |
| All    | W      | Spatial       | 1.80 | 0.05 | Global    | Y    |                        |
| All    | W      | Spatial       | 2.70 | 0.03 | Fwd. sel. |      | PCNM9                  |
| All    | F      | Environmental | 1.78 | 0.01 | Global    | Y    |                        |
| All    | F      | Environmental | 2.13 | 0.01 | Fwd. sel. |      | Order                  |
| All    | F      | Spatial       | 1.33 | 0.12 | Global    | N    |                        |
| Strong | N      | Environmental | 1.07 | 0.42 | Global    | N    |                        |
| Strong | N      | Spatial       | 0.96 | 0.58 | Global    | N    |                        |
| Strong | U      | Environmental | 1.47 | 0.07 | Global    | N    |                        |
| Strong | U      | Spatial       | 1.71 | 0.02 | Global    | Y    |                        |
| Strong | U      | Spatial       | 2.64 | 0.00 | Fwd. sel. |      | PCNM1, PCNM3           |
| Strong | E      | Environmental | 2.07 | 0.03 | Global    | Y    |                        |
| Strong | E      | Environmental | 3.83 | 0.00 | Fwd. sel. |      | OHCov, Elev, SI        |
| Strong | E      | Spatial       | 0.81 | 0.74 | Global    | N    |                        |
| Strong | T      | Environmental | 1.02 | 0.45 | Global    | N    |                        |
| Strong | T      | Spatial       | 0.66 | 0.92 | Global    | N    |                        |
| Strong | K      | Environmental | 1.84 | 0.02 | Global    | Y    |                        |
| Strong | K      | Environmental | 2.64 | 0.01 | Fwd. sel. |      | Cond, Chla             |
| Strong | K      | Spatial       | 0.59 | 0.96 | Global    | N    |                        |
| Strong | A      | Environmental | 2.18 | 0.02 | Global    | Y    |                        |
| Strong | A      | Environmental | 3.20 | 0.04 | Fwd. sel. |      | Temp                   |
| Strong | A      | Spatial       | 2.27 | 0.01 | Global    | Y    |                        |
| Strong | A      | Spatial       | 4.48 | 0.00 | Fwd. sel. |      | PCNM1, PCNM2           |
| Strong | W      | Environmental | 1.82 | 0.09 | Global    | N    |                        |
| Strong | W      | Spatial       | 1.62 | 0.12 | Global    | N    |                        |
| Strong | F      | Environmental | 1.78 | 0.08 | Global    | N    |                        |
| Strong | F      | Spatial       | 1.20 | 0.35 | Global    | N    |                        |
| Weak   | N      | Environmental | 1.16 | 0.28 | Global    | N    |                        |
| Weak   | N      | Spatial       | 0.82 | 0.82 | Global    | N    |                        |
| Weak   | U      | Environmental | 1.64 | 0.02 | Global    | Y    |                        |
| Weak   | U      | Environmental | 3.32 | 0.00 | Fwd. sel. |      | Temp, pH               |
| Weak   | U      | Spatial       | 1.63 | 0.02 | Global    | Y    |                        |
| Weak   | U      | Spatial       | 2.50 | 0.00 | Fwd. sel. |      | PCNM1, PCNM5, PCNM2    |
| Weak   | E      | Environmental | 1.37 | 0.18 | Global    | N    |                        |
| Weak   | E      | Spatial       | 0.78 | 0.81 | Global    | N    |                        |

Continued on next page

| Subset | Region | Data          | F    | P    | Model     | Sig. | Variables                           |
|--------|--------|---------------|------|------|-----------|------|-------------------------------------|
| Weak   | T      | Environmental | 1.71 | 0.04 | Global    | Y    | OHCov, Pfankuch_bottom, Chla, Depth |
| Weak   | T      | Environmental | 2.57 | 0.00 | Fwd. sel. |      |                                     |
| Weak   | T      | Spatial       | 0.82 | 0.77 | Global    | N    |                                     |
| Weak   | K      | Environmental | 1.54 | 0.05 | Global    | Y    | Cond                                |
| Weak   | K      | Environmental | 2.20 | 0.02 | Fwd. sel. |      |                                     |
| Weak   | K      | Spatial       | 1.31 | 0.10 | Global    | N    |                                     |
| Weak   | A      | Environmental | 1.05 | 0.42 | Global    | N    | PCNM1, PCNM5, PCNM2                 |
| Weak   | A      | Spatial       | 1.60 | 0.02 | Global    | Y    |                                     |
| Weak   | A      | Spatial       | 2.49 | 0.00 | Fwd. sel. |      |                                     |
| Weak   | W      | Environmental | 1.17 | 0.24 | Global    | N    | PCNM6                               |
| Weak   | W      | Spatial       | 1.44 | 0.03 | Global    | Y    |                                     |
| Weak   | W      | Spatial       | 1.67 | 0.02 | Fwd. sel. |      |                                     |
| Weak   | F      | Environmental | 1.71 | 0.02 | Global    | Y    | Order                               |
| Weak   | F      | Environmental | 2.13 | 0.02 | Fwd. sel. |      |                                     |
| Weak   | F      | Spatial       | 1.44 | 0.07 | Global    | N    |                                     |
